# Supplementary material for: Cyberbullying Victimization and Adolescent Mental Health: Evidence of Differential Effects by Sex and Mental Health Problem Type
Source: Springer Nature journal article supplement (doi:10.1007/s10964-017-0678-4), 2017-04-22
Supplement: MOESM1 [file 12239854]

Appendix 1.

Measurement of Traditional Forms of Bullying and Cyberbullying

Bullying: there are lots of ways to bully, but students who bully other students want to hurt or upset them. It’s not accidental. Usually they hurt or upset other students over and over again and are seen to have an advantage over them, such as being bigger, stronger or more popular. Sometimes a group of students will bully another student.

During the past six months, how often have you been bullied by other students (never, once or a few times, once or twice a month, once or twice a week, almost every day)?

1. Physically (e.g., hit, pushed, shoved, kicked, beaten up, had your things damaged or stolen)?

2. Verbally (e.g., called names, teased hurtfully, insulted, threatened)?

3. Socially (e.g., excluded from a group, gossiped or spread rumours)?

4. Electronically (e.g., used the internet, social media, or text messages to exclude, threaten, embarrass or hurt your feelings)?
